# Supplementary material for: α-Tocopherol-13′-Carboxychromanol Induces Cell Cycle Arrest and Cell Death by Inhibiting the SREBP1-SCD1 Axis and Causing Imbalance in Lipid Desaturation
Source: MDPI journal article supplement (doi:10.3390/ijms24119229), 2023-05-25
Supplement: s1 [file s1]

# Supplementary Material

$\alpha$ -Tocopherol-13'-carboxychromanol induces cell cycle arrest and cell death by inhibiting the SREBP1-SCD1 axis and causing imbalance in lipid desaturation

Supplementary Table S1: Sequences of PCR primers.

Supplementary Table S2: SFA- or MUFA-containing lipid species in detected lipid subclasses.

Supplementary Figure S1: Additional measurement information of apoptosis and necrosis analysis.

Supplementary Figure S2: Additional measurement information of cell cycle analysis.

Supplementary Figure S3: Absolute amounts of SFA- or MUFA-containing species of phospholipids.

Supplementary Figure S4: Detected species of triglycerides and phospholipids.

Supplementary Figure S5: Unprocessed Western blot images of Scd1 protein.

Supplementary Figure S6: Unprocessed Western blot images of Fasn protein.

Supplementary Figure S7: Unprocessed Western blot images of Srebp1 protein.

Supplementary Figure S8: Validation of the specificity of the mouse anti-Srebp1 antibody in RAW264.7 macrophages.

**Supplementary Table S1:** Sequences of PCR primers used in the study. In each case, forward and reverse primers are located in different exons.

| mRNA          | mRNA name                                                | Origin       | GenBank accession No.                                             | Forward primer             | Reverse primer          | Application size (bp) |
|---------------|----------------------------------------------------------|--------------|-------------------------------------------------------------------|----------------------------|-------------------------|-----------------------|
| <i>Scd1</i>   | Stearoyl-CoA desaturase 1                                | Mus Musculus | NM_009127.4                                                       | CAGGTTTCCAAGCGCAGTTC       | GAAGTGGAGATCTCTTGAGCA   | 144                   |
| <i>Scd2</i>   | Stearoyl-CoA desaturase 2                                | Mus Musculus | NM_009128.2                                                       | TTAGCTCTCGGGAGAACATCTTG    | GTTGATGTGCCAGCGGTACT    | 116                   |
| <i>Fasn</i>   | Fatty acid synthase                                      | Mus Musculus | NM_007988.3                                                       | GACTCGGCTACTGACACGAC       | CGAGTTGAGCTGGGTAGGG     | 123                   |
| <i>Acc1</i>   | acetyl-Coenzyme A carboxylase alpha                      | Mus Musculus | NM_133360.3                                                       | CCGAGAAAGCAGGGGATCTG       | TACCCGACGCATGGTTTTCA    | 91                    |
| <i>Acc2</i>   | acetyl-Coenzyme A carboxylase beta                       | Mus Musculus | NM_001403527.1<br>NM_133904.3<br>NM_001403528.1<br>NM_001403529.1 | CCGCTCAAGATCGAGGAGTC       | TGATCTTAACCTCGGCCTGC    | 94                    |
| <i>Becn1</i>  | Beclin 1                                                 | Mus Musculus | NM_019584.4<br>NM_001359819.1<br>NM_001359820.1<br>NM_001359821.1 | GAAGTCTGGAGGTCTCGCTC       | AGCTCGTGTCCAGTTTCAGAG   | 180                   |
| <i>Sqstm1</i> | Sequestosome 1                                           | Mus Musculus | NM_011018.3<br>NM_001290769.1                                     | TTCGGAAGTCAGCAAACCTGA      | CCGACTCCATCTGTTCTCTG    | 116                   |
| <i>Ddit3</i>  | DNA damage inducible transcript 3                        | Mus Musculus | NM_007837.4<br>NM_001290183.1                                     | CCCAGGAAACGAAGAGGAAGA<br>A | CGATGGTGCTGGGTACACTT    | 438                   |
| <i>Ddit4</i>  | DNA damage inducible transcript 4                        | Mus Musculus | NM_029083.2                                                       | TCTTGTCGCCAATCTTCGCT       | GGAGGACGAGAAACGATCCC    | 127                   |
| <i>Trib3</i>  | Tribbles homolog 3                                       | Mus Musculus | NM_175093.2                                                       | TTGTCTTGCGCGACCTCAA        | AGTCATCACGCAGGCATCTT    | 98                    |
| <i>Xbp-1</i>  | Spliced X-box binding protein 1                          | Mus Musculus | NM_001271730.1<br>NM_013842.3                                     | AACAGAGTAGCAGCGCAGAC       | GCCGTGAGTTTTCTCCCGTA    | 138                   |
| <i>Hspa5</i>  | Heat shock 70kDa protein 5                               | Mus Musculus | NM_001163434.1<br>NM_022310.3                                     | CACATATTCTGCGTCGGT         | ATTCCAAGTGCCTCCGATGA    | 202                   |
| <i>Atf4</i>   | Activating transcription factor 4                        | Mus Musculus | NM_001287180.1<br>NM_009716.3                                     | AGTGGCATCTGTATGAGCCC       | TCATAAGGTTTGGGCCGAGG    | 137                   |
| <i>p53</i>    | Tumor protein p53-inducible protein 3                    | Mus Musculus | NM_011640.3                                                       | ACCTGCACAAGCGCCTCTC        | CAGCTCCCGGAACATCTCG     | 105                   |
| <i>p21</i>    | Cyclin-dependent kinase inhibitor 1                      | Mus Musculus | NM_001111099.2                                                    | TCTGGTGCTGAGCGGCC          | TCTGCGCTTGGAGTGATAGAAAT | 106                   |
| <i>Srebp1</i> | Sterol regulatory element binding transcription factor 1 | Mus Musculus | NM_011480.4<br>NM_001313979.1<br>NM_001358314.1<br>NM_001358315.1 | GCGTGGTTTCCAACATGACC       | TGTAGTGCCTCTTGGCCAC     | 190                   |
| <i>Srebp2</i> | Sterol regulatory element binding transcription factor 2 | Mus Musculus | NM_033218.1                                                       | GGCTGTCGGGTGTCATGG         | TGACAAACTGTAGCATCTCGTCG | 196                   |

**Supplementary Table S2: SFA- or MUFA-containing lipid species detected in the lipid subclasses PC, PI, PE, PS, PG and TG.** The absolute intensities of PC, PI, PE, PS, PG and TG with SFA or MUFA species shown in **Fig. 3** and **Supplementary Fig. S3** were calculated by summarizing the absolute intensities of individual lipid species.

| PCs       |           | PIs       |           | PEs       |           |
|-----------|-----------|-----------|-----------|-----------|-----------|
| SFA       | MUFA      | SFA       | MUFA      | SFA       | MUFA      |
| 14:0_16:0 | 16:1_16:1 | 16:0_16:0 | 16:1_18:1 | 16:0_16:0 | 16:1_18:1 |
| 16:0_16:0 | 16:1_18:1 | 16:0_18:2 | 18:1_18:1 | 16:0_18:2 | 18:1_18:1 |
| 16:0_18:2 | 18:1_18:1 | 18:0_18:2 | 18:1_18:2 | 18:0_18:2 | 18:1_18:2 |
| 18:0_18:2 | 18:1_20:1 | 16:0_20:3 | 18:1_20:1 | 16:0_20:4 | 18:1_20:4 |
| 16:0_20:3 | 16:1_22:1 | 16:0_20:4 | 18:1_20:3 | 18:0_20:4 | 18:1_22:4 |
| 16:0_20:4 | 18:1_20:3 | 18:0_20:2 | 18:1_20:4 | 16:0_22:5 | 18:1_22:5 |
| 18:0_20:4 | 18:1_20:4 | 18:0_20:3 | 18:1_20:5 | 16:0_22:6 | 18:1_22:6 |
| 16:0_22:5 | 18:1_20:5 | 18:0_20:4 |           | 18:0_22:5 |           |
| 16:0_22:6 | 18:1_22:4 | 16:0_22:5 |           | 18:0_22:6 |           |
| 18:0_22:5 | 18:1_22:5 | 16:0_22:6 |           |           |           |
| 18:0_22:6 | 18:1_22:6 | 18:0_22:5 |           |           |           |
|           |           | 18:0_22:6 |           |           |           |

  

| PSs       |           | PGs       |           | TGs            |                |
|-----------|-----------|-----------|-----------|----------------|----------------|
| SFA       | MUFA      | SFA       | MUFA      | SFA            | MUFA           |
| 16:0_16:0 | 16:1_18:1 | 16:0_18:2 | 16:1_18:1 | 16:0_16:0_16:0 | 18:1_16:1_16:1 |
| 18:0_18:2 | 18:1_18:1 |           | 18:1_18:1 | 16:0_16:0_18:2 | 18:1_16:1_18:2 |
| 16:0_20:4 | 18:1_20:1 |           | 18:1_20:4 | 16:0_16:0_18:0 | 18:1_16:1_22:6 |
| 18:0_20:3 | 16:1_22:1 |           | 18:1_22:5 | 16:0_16:0_20:4 |                |
| 18:0_20:4 |           |           | 18:1_22:6 | 16:0_18:0_18:2 |                |
| 16:0_22:5 |           |           |           | 16:0_18:0_18:0 |                |
| 16:0_22:6 |           |           |           | 16:0_16:0_22:6 |                |
| 18:0_22:5 |           |           |           | 16:0_16:0_22:5 |                |
| 18:0_22:6 |           |           |           | 18:0_18:2_18:2 |                |

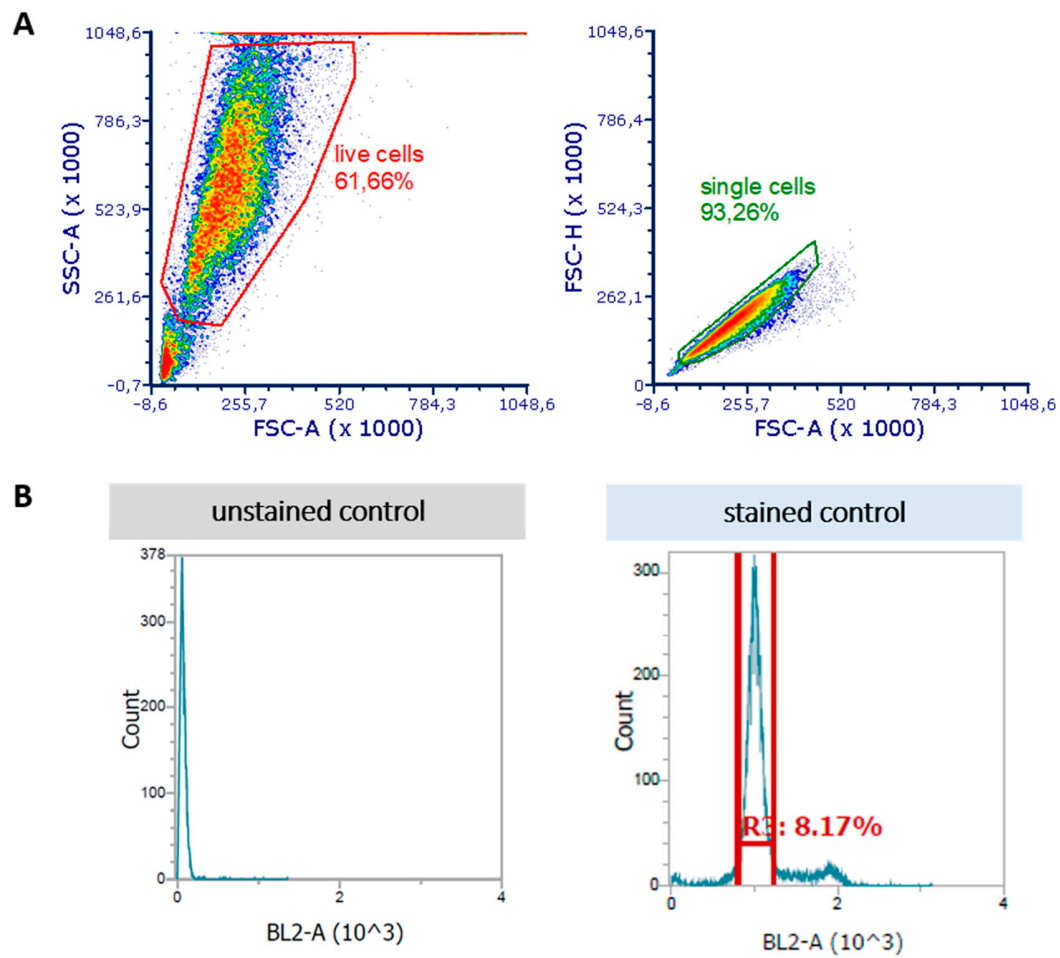

**Supplementary Figure S1:** Additional measurement information of cell cycle analysis (results shown in Fig. 5). Gating strategy (A). Additional histograms of unstained and stained control (propidium iodide: BL2-A) (B).

**A**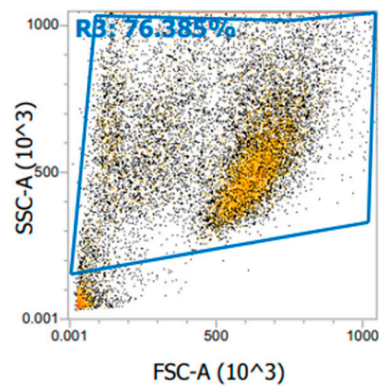**B**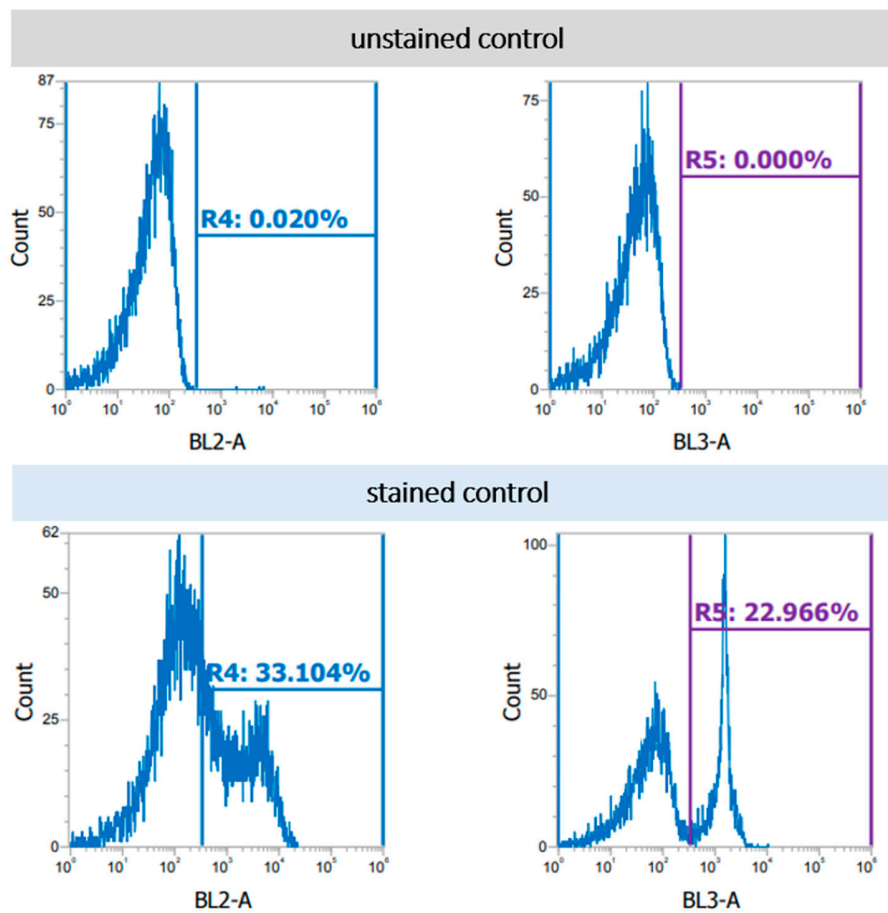

**Supplementary Figure S2:** Additional measurement information of apoptosis and necrosis analysis (results shown in **Figs. 3** and **9**). Gating strategy (A). Additional histograms of unstained and stained control (PE Annexin V: BL2-A; 7-AAD: BL3-A) (B).

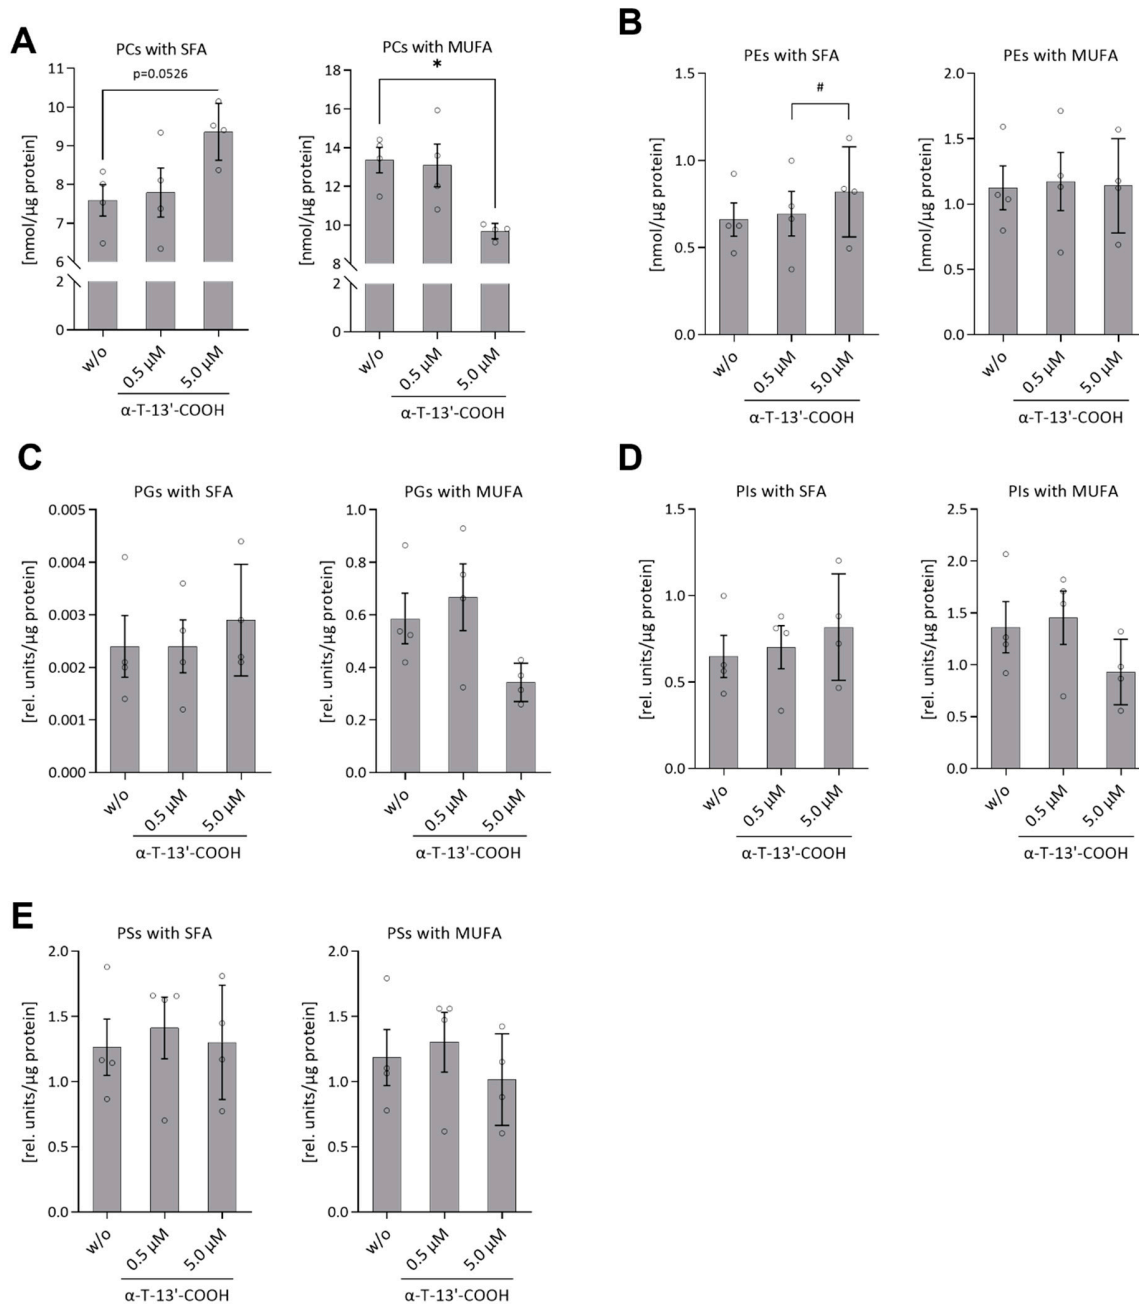

**Supplementary Figure S3:** Absolute amount of SFA- or MUFA-containing species of PC (A), PE (B), PG (C), PI (D) and PS (E). RAW264.7 cells were incubated with 0.5 or 5.0 μM α-T-13'-COOH for 24 h. The content of different species of TGs and phospholipids was then analyzed using UPLC-MS/MS. Experiments were performed in four independent biological replicates (points). Data are presented as means ± standard error of the mean (SEM). p-Values were calculated using repeated measurement one-way ANOVA with Tukey's post-hoc test. \*,  $p < 0.05$  (w/o vs. α-T-13'-COOH) or #,  $p < 0.05$  (0.5 μM α-T-13'-COOH vs. 5.0 μM α-T-13'-COOH).

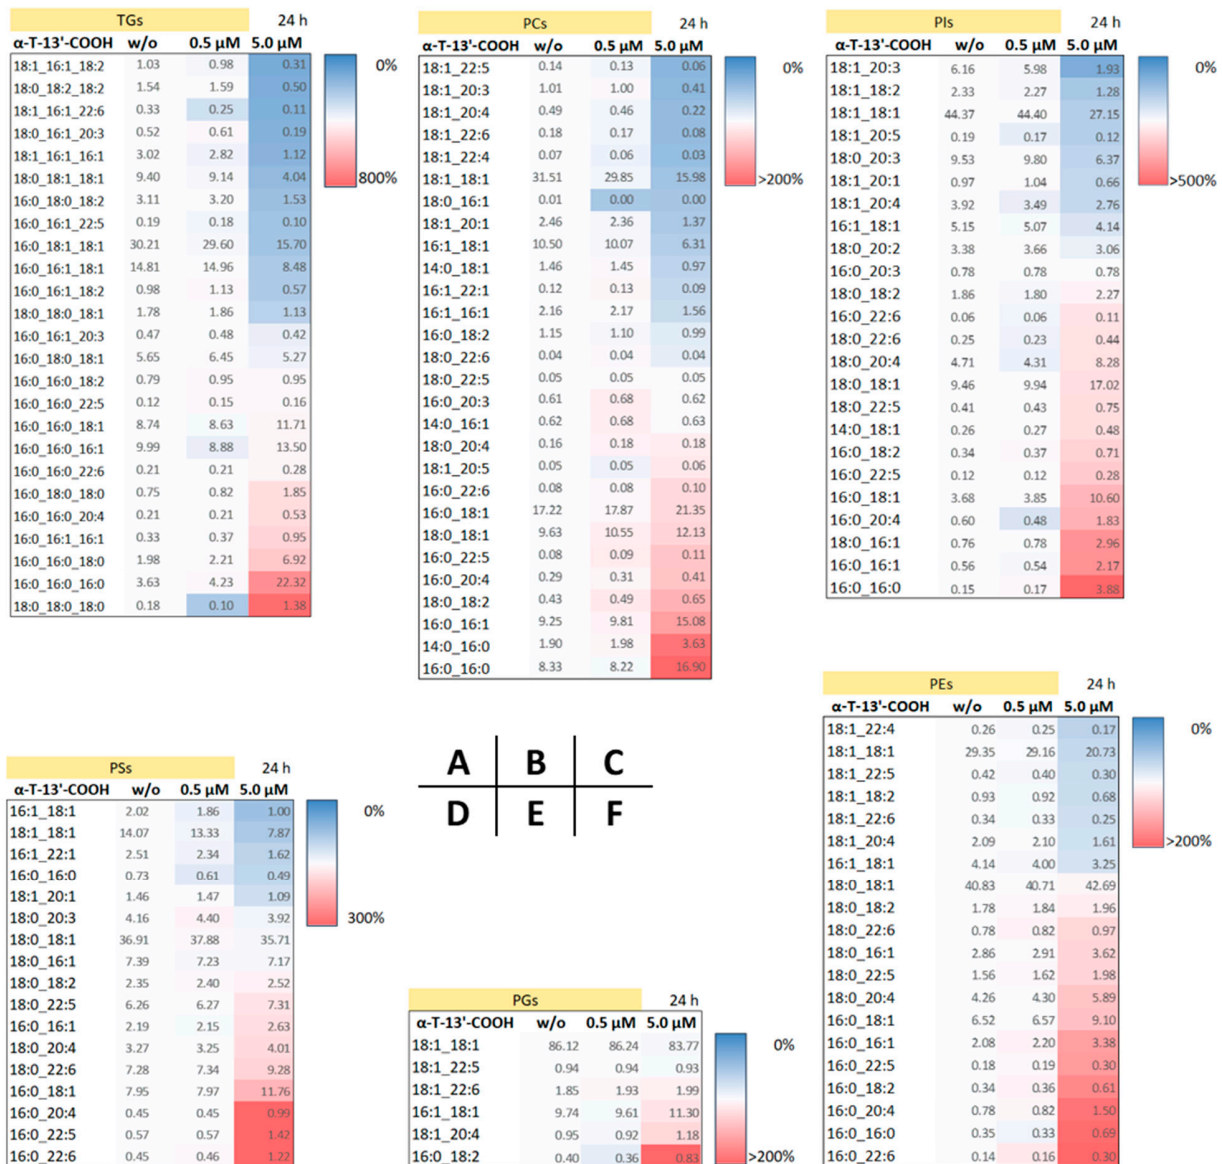

**Supplementary Figure S4:** Impact of  $\alpha$ -T-13'-COOH on the fatty acid composition of TGs and phospholipids. RAW264.7 cells were incubated with 0.5 or 5.0  $\mu$ M  $\alpha$ -T-13'-COOH for 24 h. The content of different species of TGs and phospholipids was then analyzed using UPLC-MS/MS. Heatmap showing the cellular proportions of indicated lipid species relative to the total lipid subclass (100%) (A: TG; B: PC; C: PI; D: PS; E: PG; F: PE). Experiments were performed in four independent biological replicates and the data are presented as mean value. Color indicates the fold change in the cellular proportions compared to the vehicle control. Red indicates elevated (> 100%) and blue reduced cellular proportions (< 100%) as compared to vehicle control.

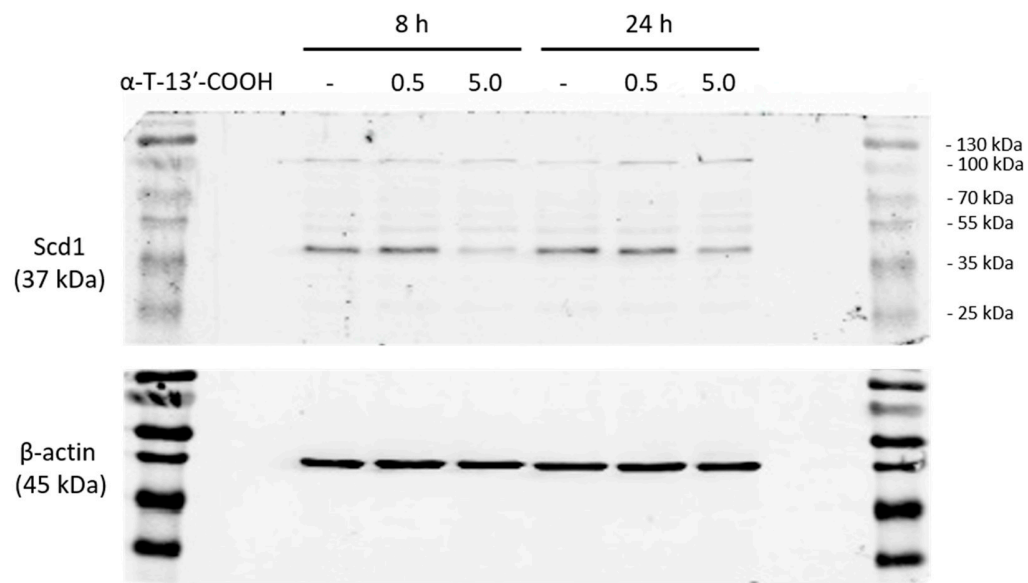

**Supplementary Figure S5:** Unprocessed Western Blot images of Scd1 protein (whole cell lysate) shown in Fig. 8.



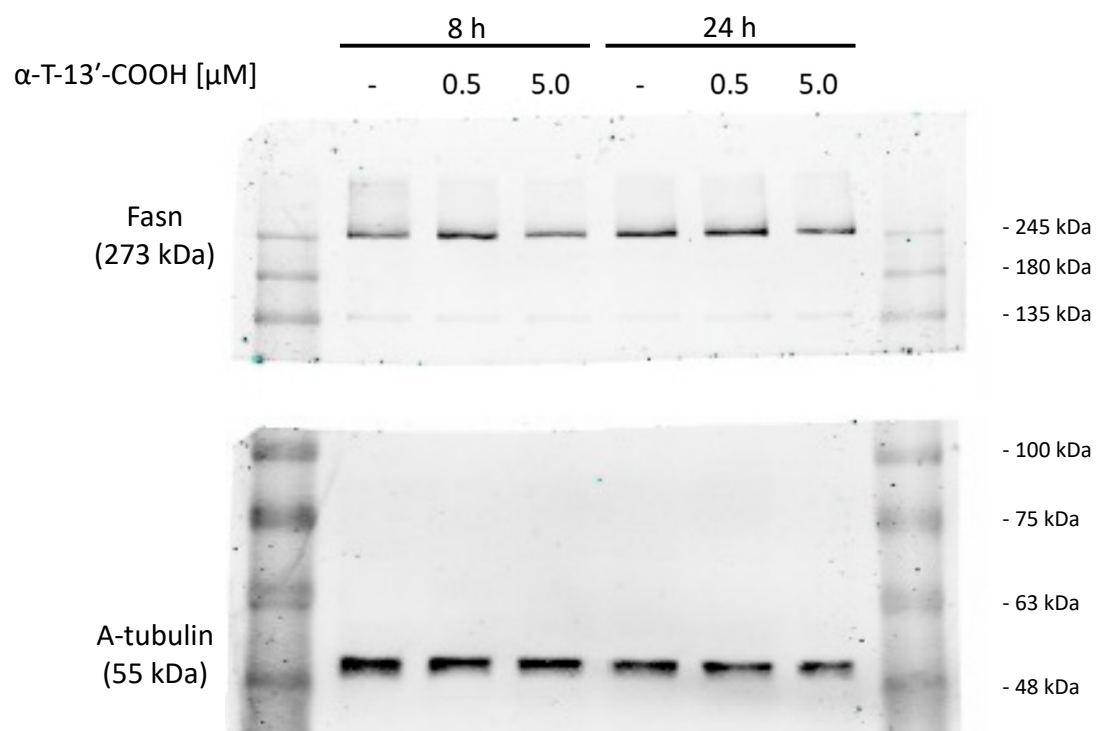

**Supplementary Figure S6:** Unprocessed Western Blot images of Fasn protein (whole cell lysate) shown in Fig. 8.

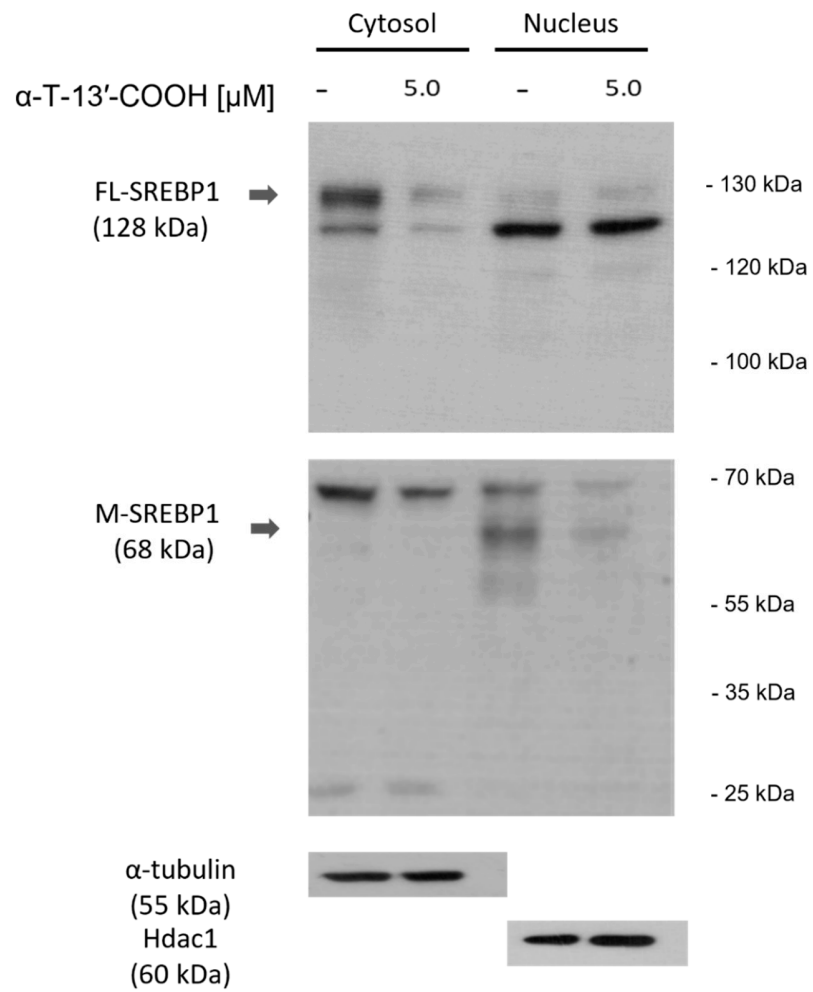

**Supplementary Figure S7:** Unprocessed Western Blot images of Srebp1 protein (cytosol and nucleus) shown in **Fig. 10**. The membrane was separated (25-70 kDa and 100-130 kDa) after blotting to use different incubation conditions as described in method section.

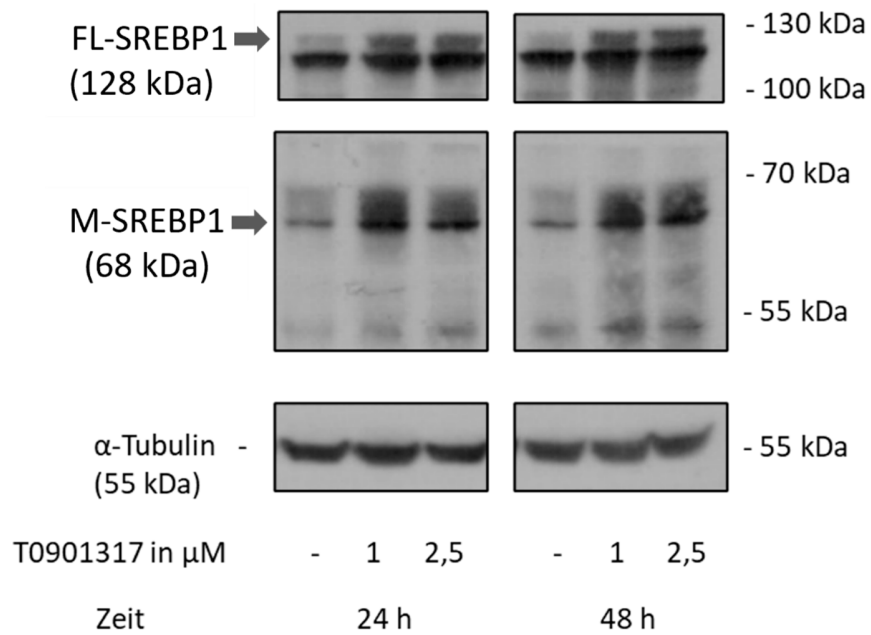

**Supplementary Figure S8:** Validation of the specificity of the mouse anti-Srebp1 specificity antibody in RAW264.7 macrophages. Cells were treated with vehicle (DMSO) or the LXR agonist T0901317 for 24 or 48 h. Protein expression of Srebp1 (full-length and mature forms) was analyzed by Western blot in whole cell lysates. The bands marked with arrows increased in intensity upon treatment with T0901317 and are designated as full-length and mature forms of Srebp1, respectively.
